# Supplementary material
Source: Research Square preprint supplement (doi:10.21203/rs.3.rs-9086560/v1)
Supplement: Supplementary file 1 [file 8b15dbe25d15262030565e20.docx]

**Supporting information**

**Development of Potential CDK9 Inhibitors through Pharmacophore-Based Virtual Screening, 3D-QSAR, Molecular Docking, MD Simulation, and *In Vitro* Anticancer Evaluation**

Rajkumar Reddyrajulaa,*, Umadevi Etikyalab, Dinesha Pc, Sampat P Vc, Shreeganesh Subraya Hedgec,d, Mohammed Muzaffar-Ur-Rehmane, Chandra Sekhar Kondapalli Venkata Gowrif, Udayakumar Dc, Vijjulatha Mangab,*

*aDepartment of Chemistry, School of Sciences, Woxsen University, Hyderabad -502345, Telangana, India.*

*bMedicinal Chemistry Laboratory, Department of Chemistry, Osmania University, Hyderabad-500 076, Telangana, India.*

*cDepartment of Chemistry, National Institute of Technology Karnataka, Surathkal-575025, Mangalore, Karnataka, India.*

*dDepartment of Chemistry, School of Engineering, Dayananda Sagar University, Harohalli, Bengaluru -562112, Karnataka, India.*

*eMedicinal Chemistry Research Laboratory, Department of Pharmacy, Birla Institute of Technology and Science Pilani, Pilani Campus, Pilani-333031, Rajasthan. India.*

*fDepartment of Chemistry, Birla Institute of Technology and Science Pilani, Hyderabad Campus, Jawahar Nagar, Kapra Mandal, Hyderabad 500078, Telangana, India.*

*** **Corresponding authors -** [rajkumar.reddyrajula111@gmail.com](mailto:rajkumar.reddyrajula111@gmail.com), [Vijjulathamanga@gmail.com](mailto:Vijjulathamanga@gmail.com)

**Contents**

**1. Dataset.**

**2. Materials and instruments.**

**3. Cell lines and Culture Conditions**

**4. Cell viability assay.**

**5. Statistical analysis.**

**6. Molecular Docking**

**7. MD simulation.**

**8. Representative NMR and ESI-Mass spectra of final compounds.**

**1. Dataset**

**Table S1**. Binding energy, experimental and predicted pIC50 values of training and test set molecules of pyrimidine based CDK9 inhibitors.

| **Comp** | **R1** | **R2** | **Expt.**  **pIC50** | **Pred.**  **pIC50** | **Fitness Score** | **Binding energy (kcal/mol)** |
| --- | --- | --- | --- | --- | --- | --- |
| 1 |  |  | 8.46 | 8.397 | 2.54 | -49.32 |
| 2* |  |  | 8.09 | 8.305 | 2.38 | -46.71 |
| 3* |  |  | 9.04 | 8.954 | 2.63 | -47.58 |
| 4 |  |  | 9.81 | 9.66 | 2.52 | -46.43 |
| 5 |  |  | 9.94 | 9.21 | 2.48 | -52.61 |
| 6 |  |  | 10.29 | 9.41 | 2.50 | -53.18 |
| 7 |  |  | 9.36 | 9.18 | 2.64 | -53.89 |
| 8 |  |  | 9.12 | 9.26 | 2.42 | -56.42 |
| 9 |  |  | 9.75 | 9.72 | 2.32 | -53.45 |
| 10 |  |  | 8.95 | 8.87 | 2.62 | -52.99 |
| 11* |  |  | 9.05 | 9.074 | 2.35 | -54.35 |
| 12 |  |  | 8.00 | 8.15 | 2.837 | -43.26 |
| 13* |  |  | 8.48 | 8.489 | 2.47 | -49.67 |
| 14 |  |  | 8.83 | 8.96 | 2.51 | -52.56 |
| 15 |  |  | 9.36 | 9.2 | 2.817 | -44.75 |
| 16 |  |  | 8.16 | 8.31 | 2.57 | -49.77 |
| 17 |  |  | 8.03 | 8.01 | 2.71 | -46.79 |
| 18 |  |  | 9.18 | 9.18 | 2.49 | -51.65 |
| 19 |  |  | 8.57 | 8.42 | 2.73 | -50.46 |
| 20 |  |  | 8.16 | 8.31 | 2.72 | -52.34 |
| 21* |  |  | 8.86 | 8.94 | 2.89 | -48.55 |
| 22 |  |  | 8.20 | 8.58 | 2.68 | -49.01 |
| 23 |  |  | **10.40** | **10.17** | **2.48** | **-68.39** |

**Expt. pIC50 :** Experimental pIC50; **Pred. pIC50 :**Predicted pIC50.

**Table S2**. Binding energy, experimental and predicted pIC50 values of training and test set molecules of benzotriazole based CDK9 inhibitors.

| **Comp** | **R1** | **R2** | **Expt.**  **pIC50** | **Pred.**  **pIC50** | **Fitness Score** | **Binding energy (Kcal/mol)** |
| --- | --- | --- | --- | --- | --- | --- |
| 24 |  | H | 8.35 | 8.25 | 1.603 | -60.72 |
| 25 |  | H | 8.42 | 8.67 | 1.598 | -55.98 |
| 26 |  | H | 8.38 | 8.24 | 1.591 | -65.93 |
| 27 |  | H | 8.63 | 8.63 | 1.579 | -65.29 |
| 28* |  | H | 8.17 | 8.316 | 1.675 | -59.59 |
| 29 |  | H | 8.51 | 8.76 | 1.649 | -61.33 |
| 30 |  | H | 8.02 | 8.137 | 1.658 | -61.04 |
| 31 | H |  | 8.51 | 8.43 | 1.460 | -58.36 |
| 32 | H |  | 8.46 | 8.42 | 1.372 | -62.18Ex |
| 33 | H |  | 8.4 | 8.41 | 1.262 | -64.83 |
| 34* | H |  | 8.47 | 8.45 | 1.258 | -65.33 |
| 35 | H |  | 8.71 | 8.78 | 1.210 | -65.24 |
| 36 | H |  | 8.87 | 8.88 | 1.474 | -59.19 |
| 37* | H |  | 8.53 | 8.5 | 1.191 | -60.56 |

**Table S3**. Binding energy, experimental and predicted pIC50 values of training and test set molecules of pyrimidine-macrocycle based CDK9 inhibitors.

| **Comp** | **R** | **L** | **Expt.**  **pIC50** | **Pred.**  **pIC50** | **Fitness Score** | **Binding energy (Kcal/mol)** |
| --- | --- | --- | --- | --- | --- | --- |
| 38 |  |  | 8.95 | 8.93 | 2.529 | -49.08 |
| 39 |  |  | 9.04 | 9.1 | 2.502 | -39.14 |
| 40* |  |  | 8.67 | 8.61 | 2.509 | -73.54 |
| 41 |  |  | 8.5 | 8.47 | 2.515 | -59.45 |
| 42 |  |  | 8.55 | 8.52 | 2.563 | -47.77 |
| 43* |  |  | 8.95 | 8.98 | 2.489 | -26.81 |
| 44 |  |  | 8.49 | 8.52 | 2.422 | -60.43 |
| 45* |  |  | 8.67 | 8.62 | 2.474 | -60.28 |
| 46 |  |  | 8.11 | 8.19 | 2.472 | -61.11 |
| 47 |  |  | 8.63 | 8.6 | 2.405 | -37.07 |
| 48 |  |  | 8.49 | 8.53 | 2.392 | -31.91 |
| 49 |  |  | 8.69 | 8.74 | 2.387 | -40.82 |
| 50 |  |  | 8.58 | 8.69 | 2.429 | -57.47 |

**Table S4**. Binding energy, experimental and predicted pIC50 values of training and test set molecules of pyrimidine-ether based CDK9 inhibitors.

| **Comp** | **R1** | **R2** | **Expt.**  **pIC50** | **Pred.**  **pIC50** | **Fitness Score** | **Binding energy (Kcal/mol)** |
| --- | --- | --- | --- | --- | --- | --- |
| 51 |  |  | 7.06 | 6.98 | 1.287 | -54.63 |
| 52* |  |  | 7.98 | 8.191 | 1.149 | -51.84 |
| 53 |  |  | 7.57 | 7.56 | 1.188 | -51.41 |
| 54 |  |  | 7.22 | 7.16 | 1.117 | -63.05 |
| 55 |  |  | 7.07 | 7.22 | 1.425 | -68.56 |

*Training set compounds.

**2. Materials and instruments**

All requisite reagents and solvents were procured from Sigma-Aldrich, Alfa Aesar, Merck, and Spectrochem and were used without further purification. Column chromatography was performed for product purification using silica gel (Merck, 60-120 mesh). Reaction progress was monitored via thin-layer chromatography (TLC) on 60 F254 silica gel-coated plates (Merck KGaA) under UV light. The 1H NMR and 13C NMR spectra of the synthesized compounds were recorded on a Bruker spectrometer operating at 400 MHz for 1H NMR and 100 MHz for 13C NMR, with tetramethylsilane (TMS) as the internal standard. Electrospray ionization (ESI) mass spectra were obtained using a Waters Micromass Q-Tof micro-spectrometer. Elemental analysis was performed using a Thermo Electron Corporation EA-112 Series C, H, N, S analyzer. The cancer cell lines (A549, SiHa, HeLa, MCF-7, MDA-MB-231, MDA-MB-T41, and MDA-MB-T32) and human embryonic kidney cells (HEK 293t) were obtained

**3. Cell lines and Culture Conditions**

The human cell lines A549 (lung carcinoma), SiHa and HeLa (cervical carcinoma), MCF-7 and MDA-MB-231 (breast carcinoma), and HEK-293T were obtained from authenticated cell repositories from the National Centre for Cell Sciences (NCCS) Pune, India. The cells were cultured under standard conditions in appropriate growth media supplemented with fetal bovine serum and antibiotics in a humidified incubator at 37 °C with 5% CO₂. All experiments were conducted using commercially available, established cell lines. Therefore, no human participants or freshly derived human tissues were involved, and specific ethical approval was not required according to institutional guidelines for in vitro studies using established cell lines.

**4. Cell viability assay**

The cancer cell lines (A549, SiHa, HeLa, MCF-7, MDA-MB-231, MDA-MB-T41, and MDA-MB-T32) and human embryonic kidney cells (HEK 293t) were grown in DMEM supplemented with 10% FBS and 1% penicillin and streptomycin antibiotics in 5% CO2 atmosphere at 37° C in an incubator. The anti-tumor activity of title compounds was tested by MTT assay. Briefly, the A549, SiHa, HeLa, MCF-7, MDA-MB-231 and HEK 293t cells were seeded in 96-well plates at a density of 3×103 cells per well and incubated at 37° C in 5% CO2 incubator for overnight. The overnight grown cultured cells ­­­were treated with various concentrations (0, 5, 10, 20, 40, 80, 100 µM) of final compounds for 24 hours. After that 20 µl of MTT dye (5mg/ml in PBS) was added to each well and incubated for 4 hours at 37° C. Following that, the media was discarded and the plates were incubated for 30 minutes in a shaker incubator with 100 µl of DMSO. The absorbance was measured at a wavelength of 590 nm in an ELISA micro plate reader (Multiskan FC micro platereader-Thermo scientific). Data from three independent experiments is presented as the average value of triplicates and the inhibitory concentration (IC50) of final compounds was calculated using Graph-pad Prism software.

**5. Statistical analysis**

The statistical analysis was performed using GraphPad Prism version 6.01. The data represented as the mean ±standard deviation (SD), statistical significance evaluated by one-way analysis of variance (ANOVA) followed by Tukey's tests. All the experiments were performed in triplicates and P value ≤ 0.05 is considered to be statistically significant.

**6. Molecular Docking**


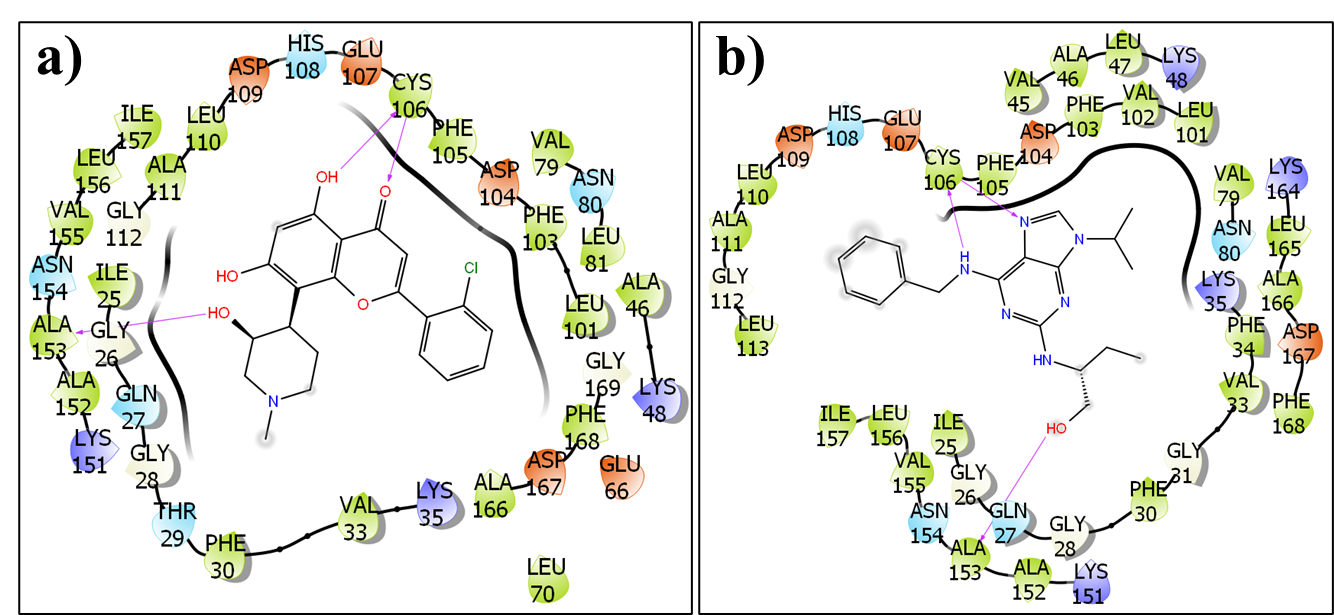


**Figure S1**. a) LID of Flavopiridol; b) LID of Roscovitine.

**7. MD simulation.**


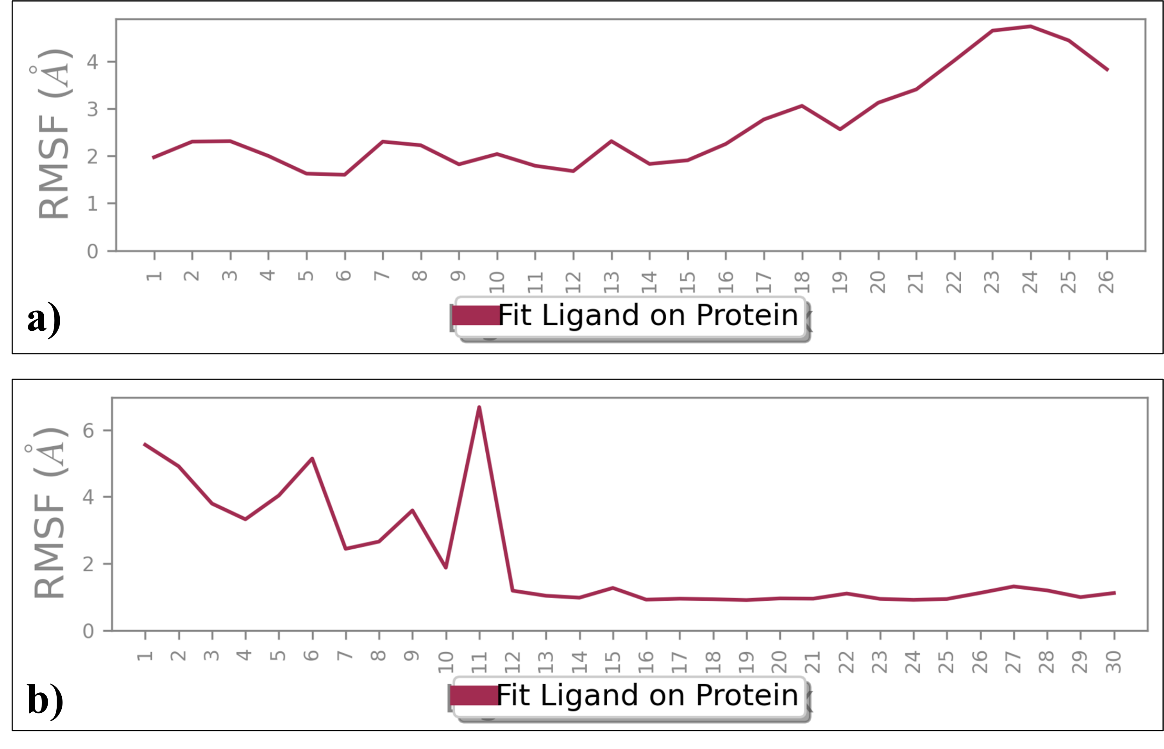


**Figure S2**. a) RMSF plot **D3**; b) RMSF plot of **D6.**


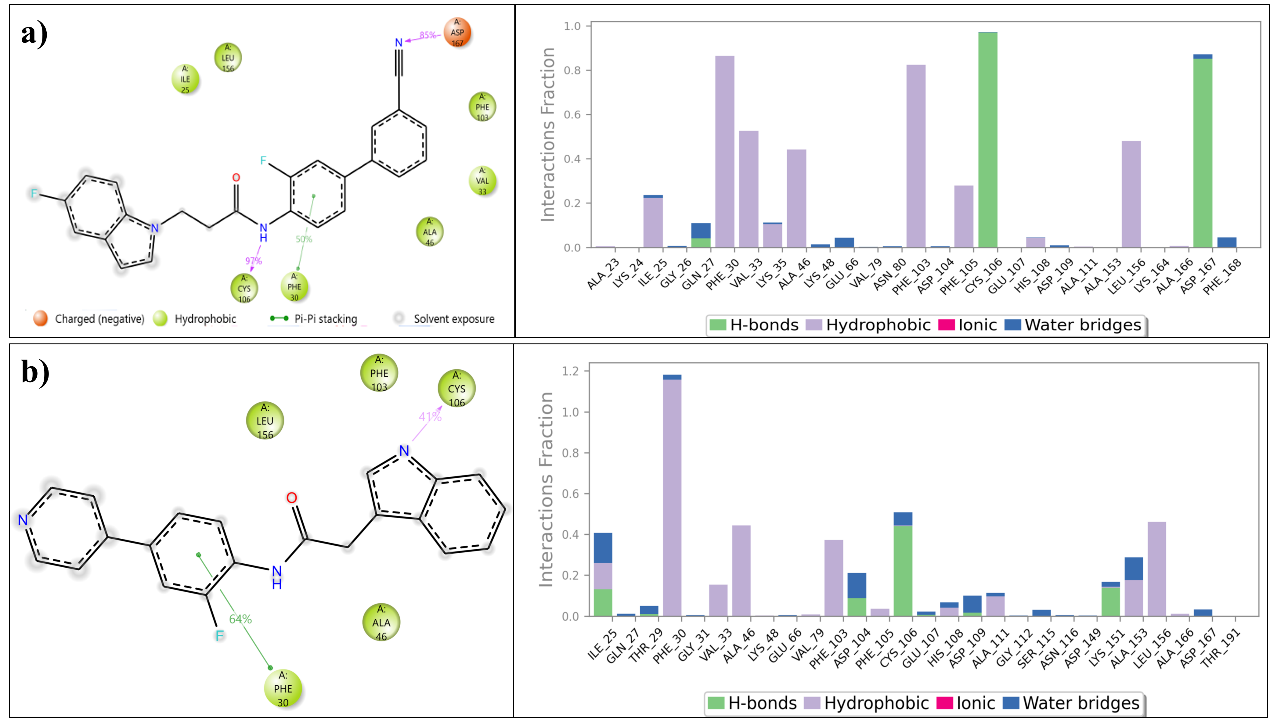


**Figure S3**. a) CDK9 + **D3** interactions; b) CDK9 + **D6** interactions.

**8. Representative NMR and ESI-Mass spectra of final compounds.**

**
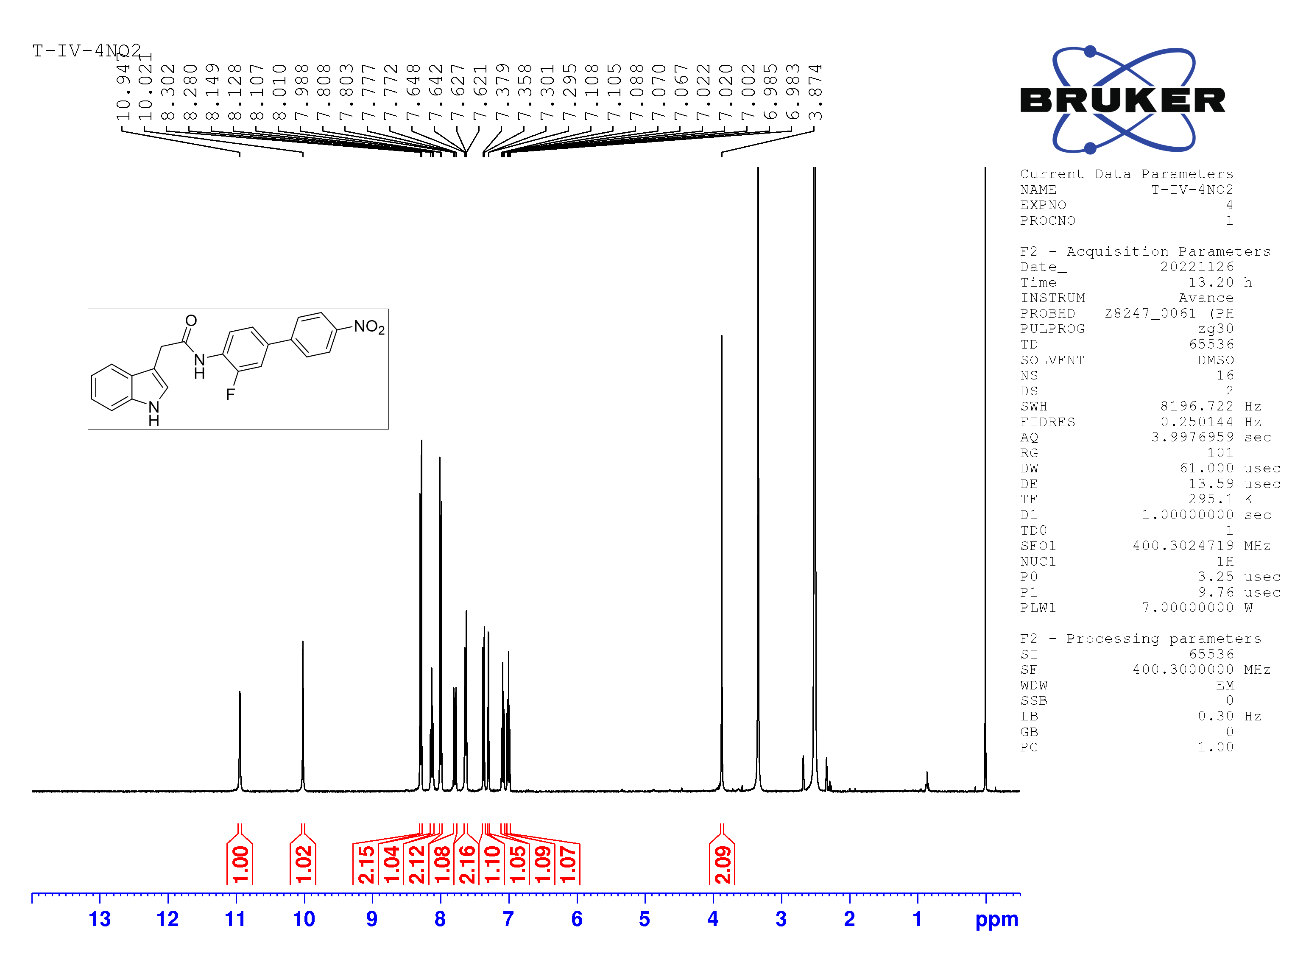
**

**Figure S4**. 1HNMR spectrum of **D1.**

**
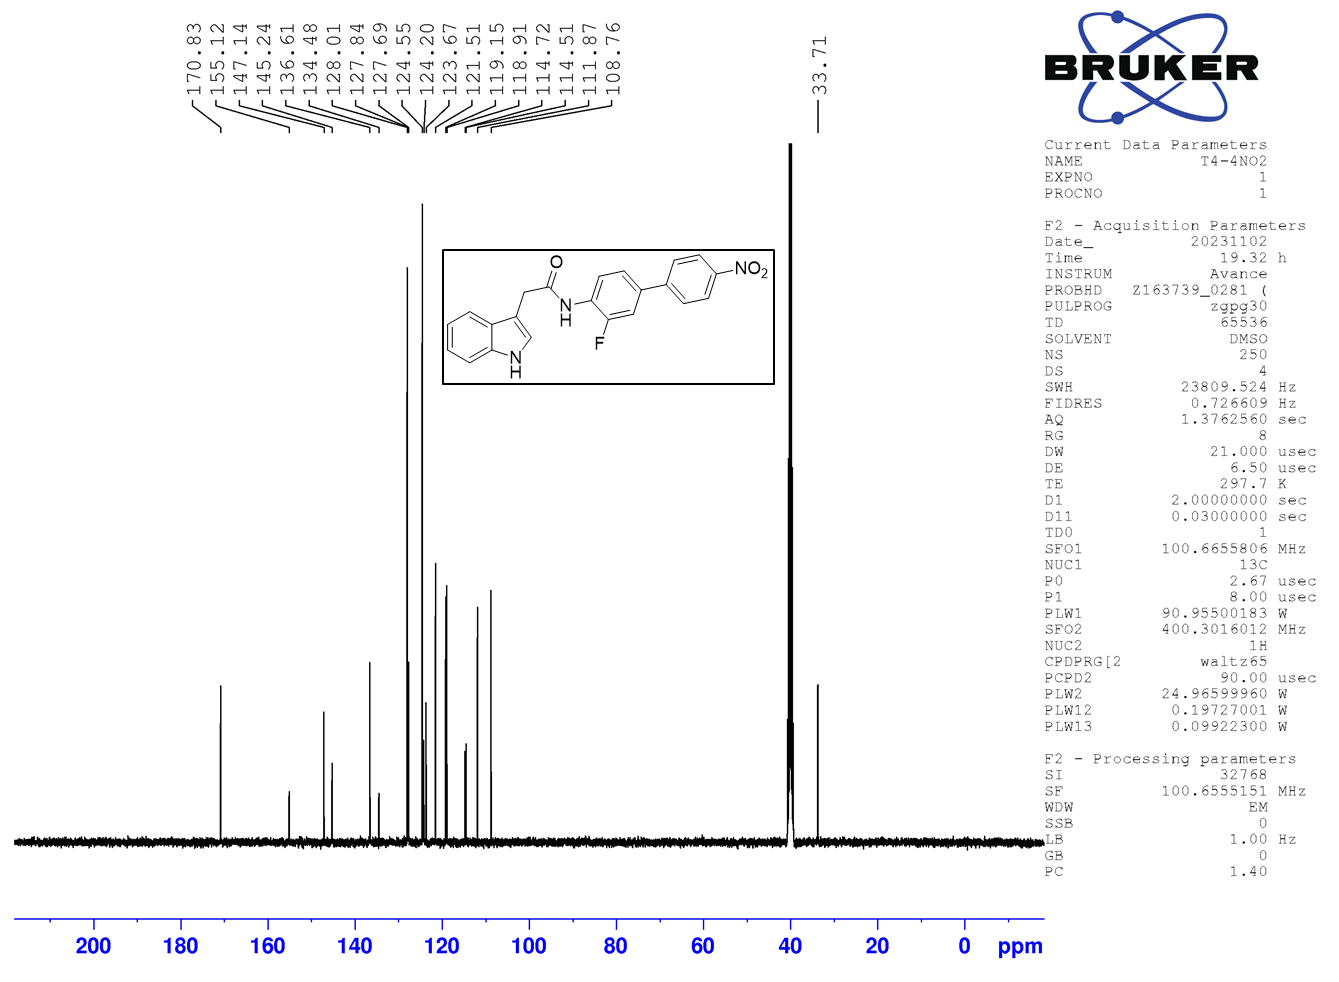
**

**Figure S5**. 13CNMR spectrum of **D1.**

**
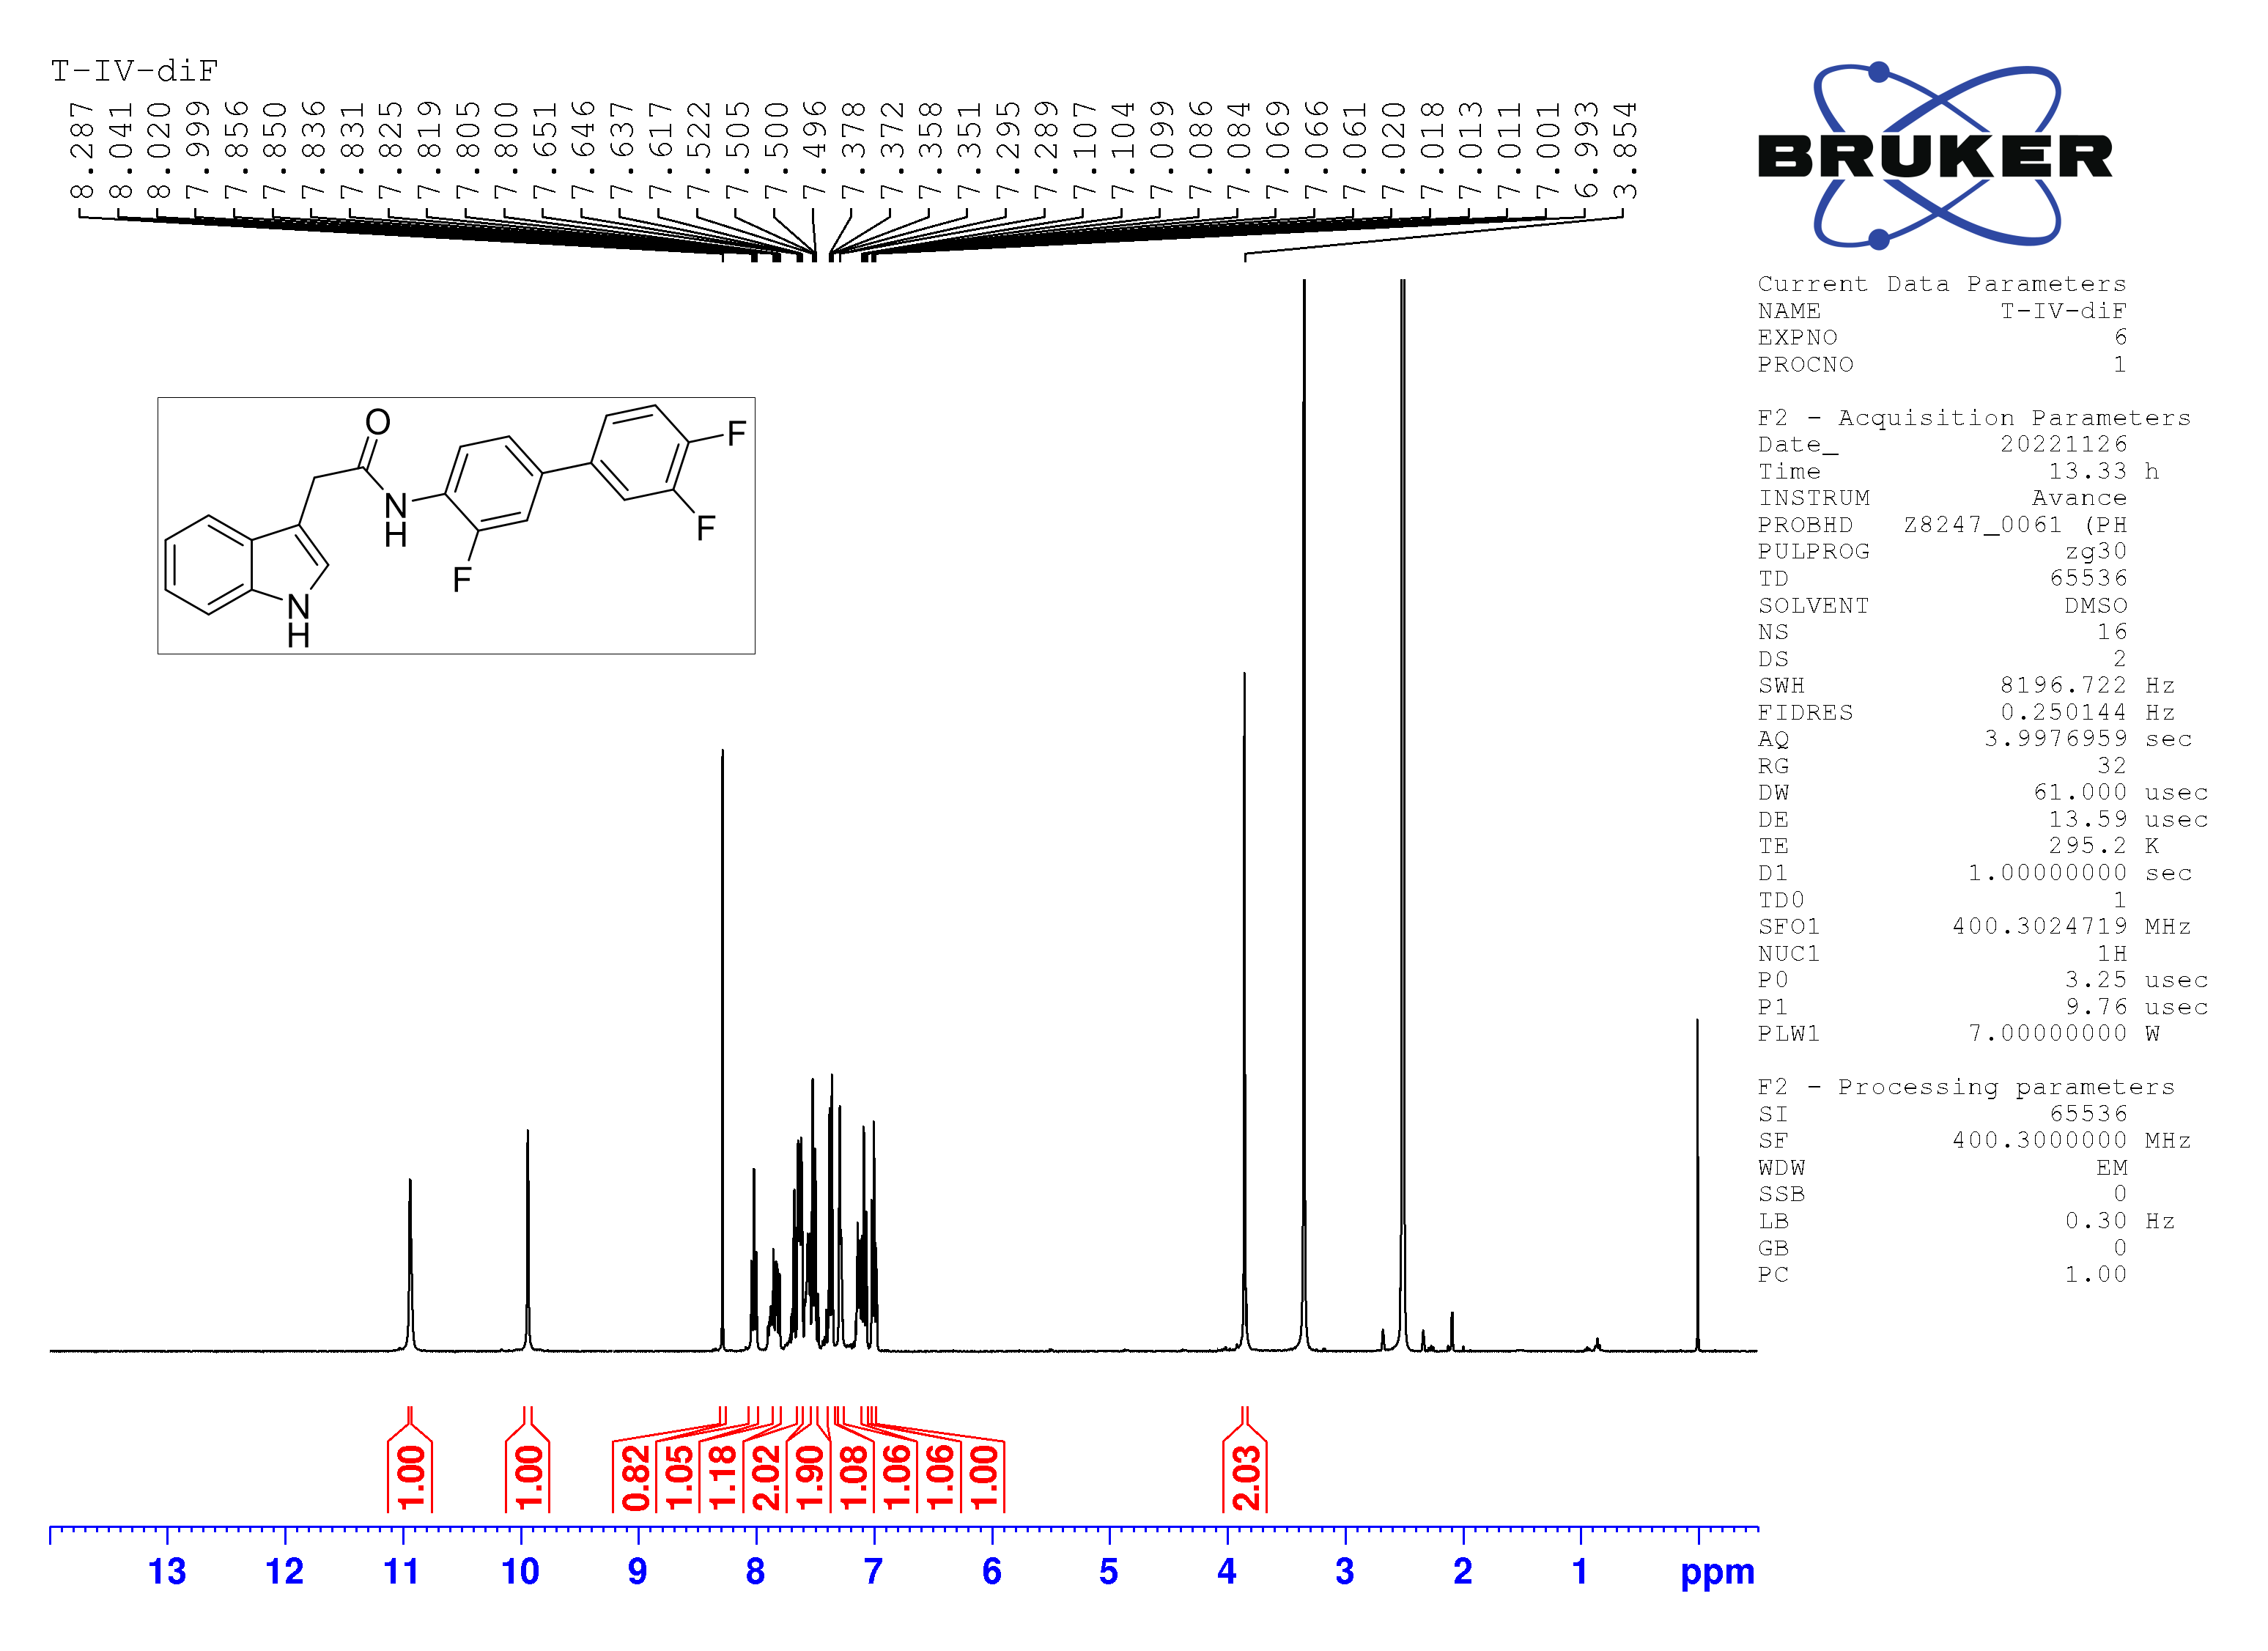
**

**Figure S6**. 1HNMR spectrum of **D2.**

**
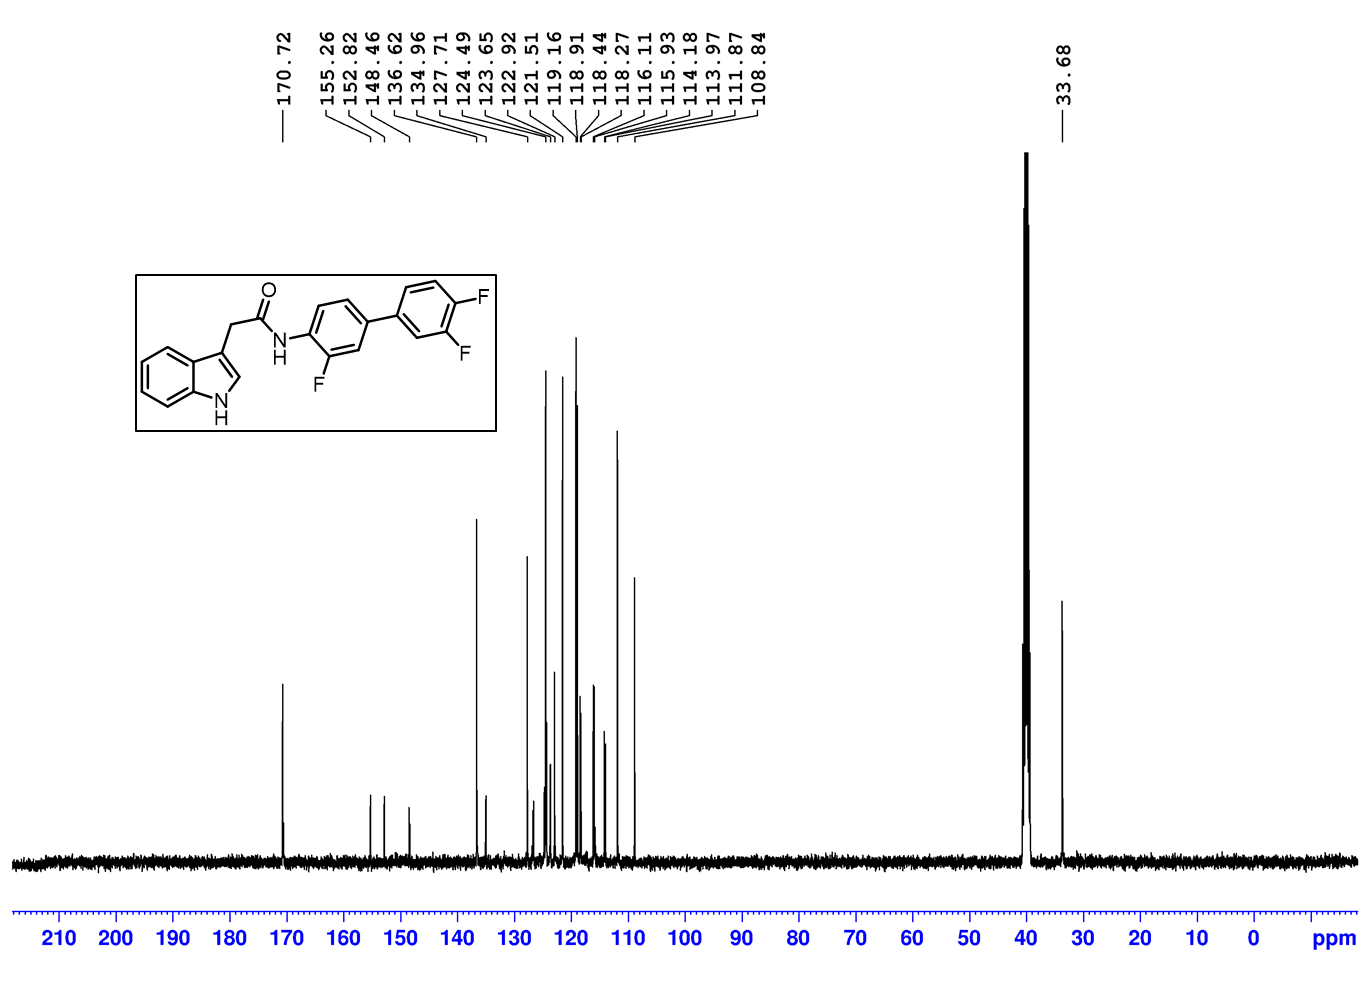
**

**Figure S7**. 13CNMR spectrum of **D2.**

**
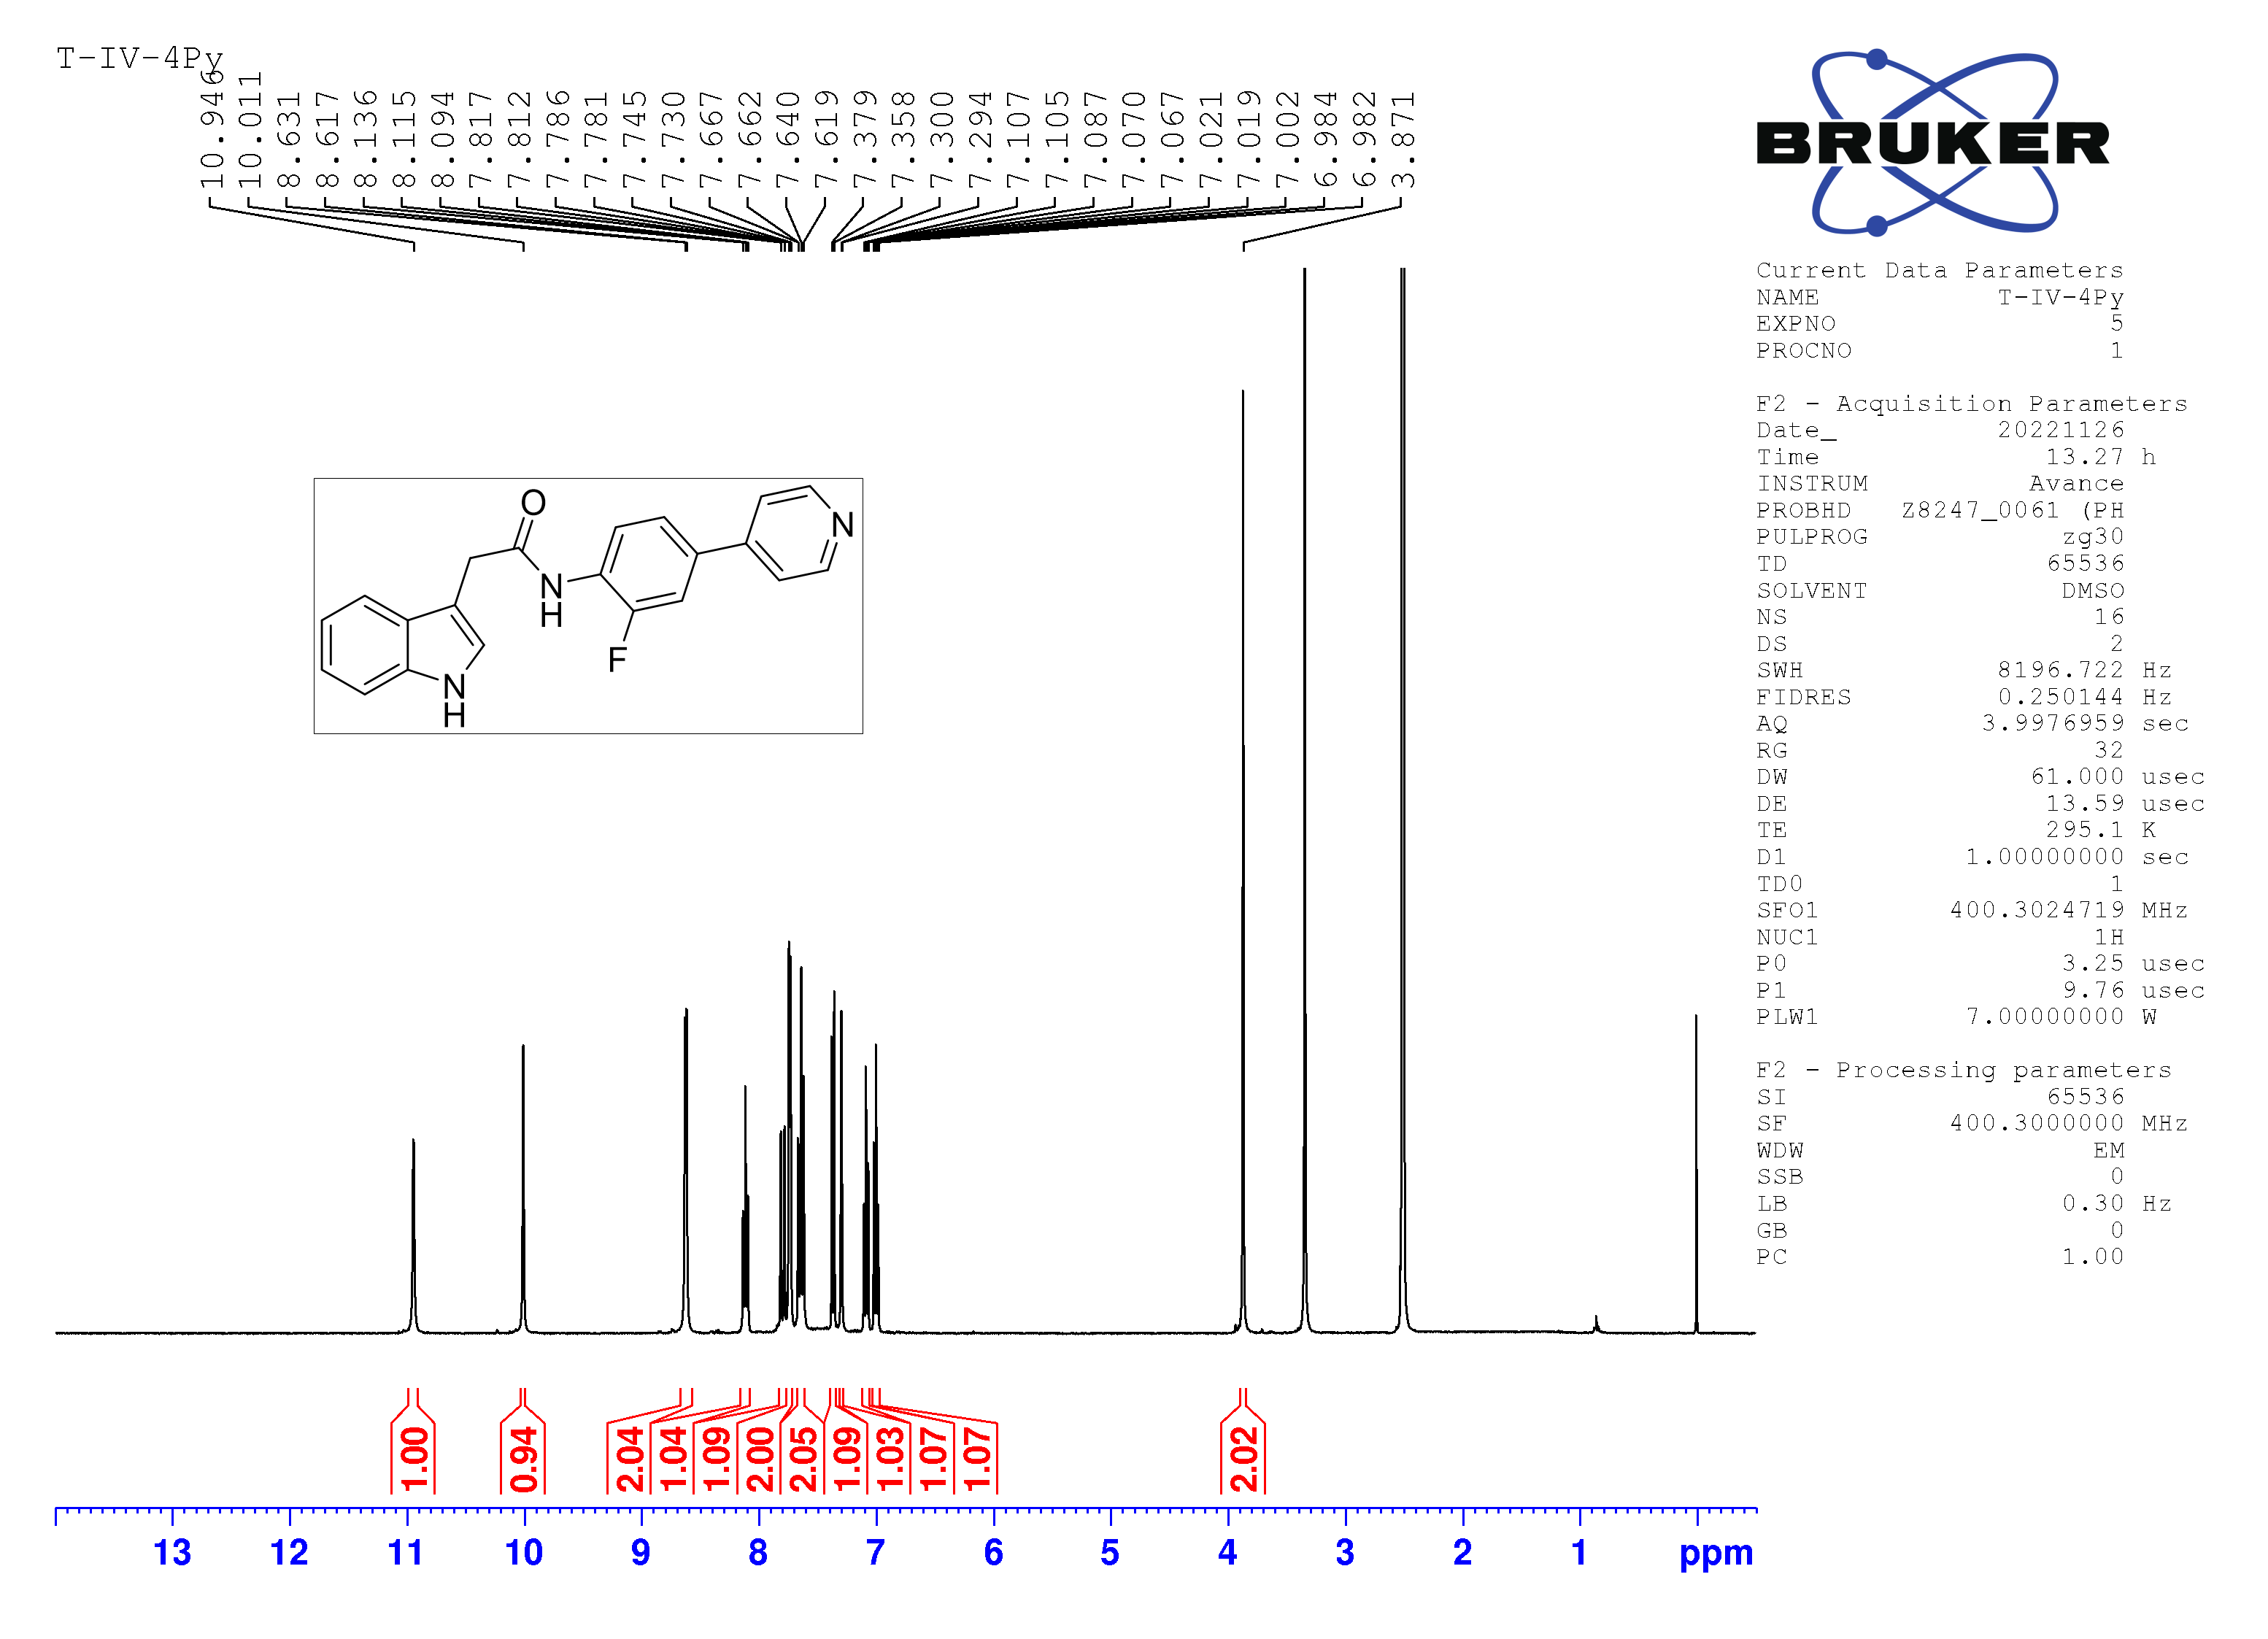
**

**Figure S8**. 1HNMR spectrum of **D3.**

**
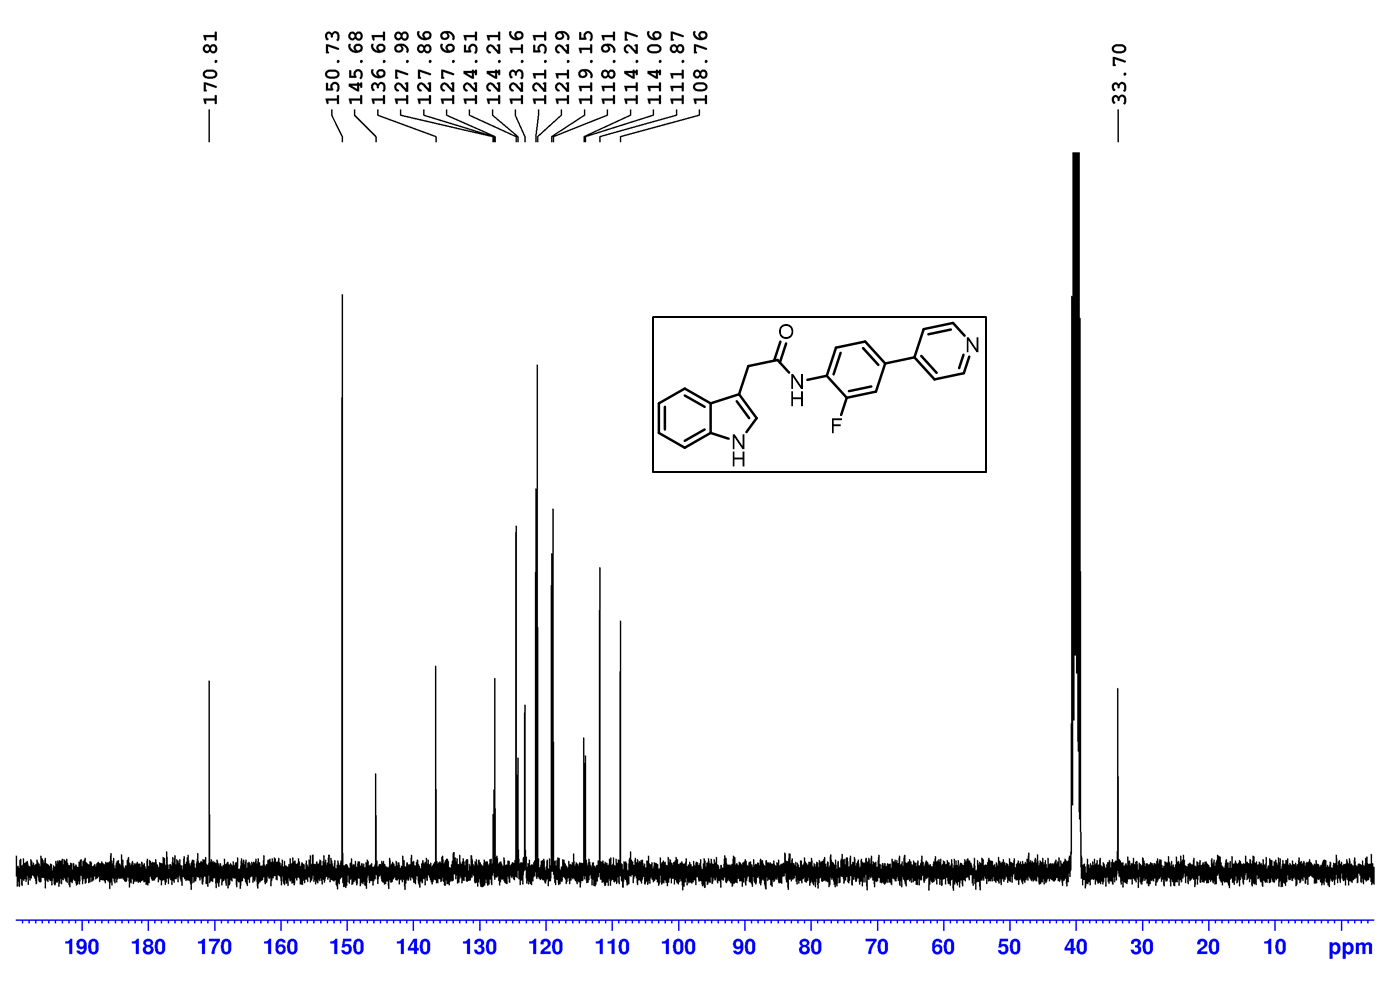
**

**Figure S9**. 13CNMR spectrum of **D3.**

**
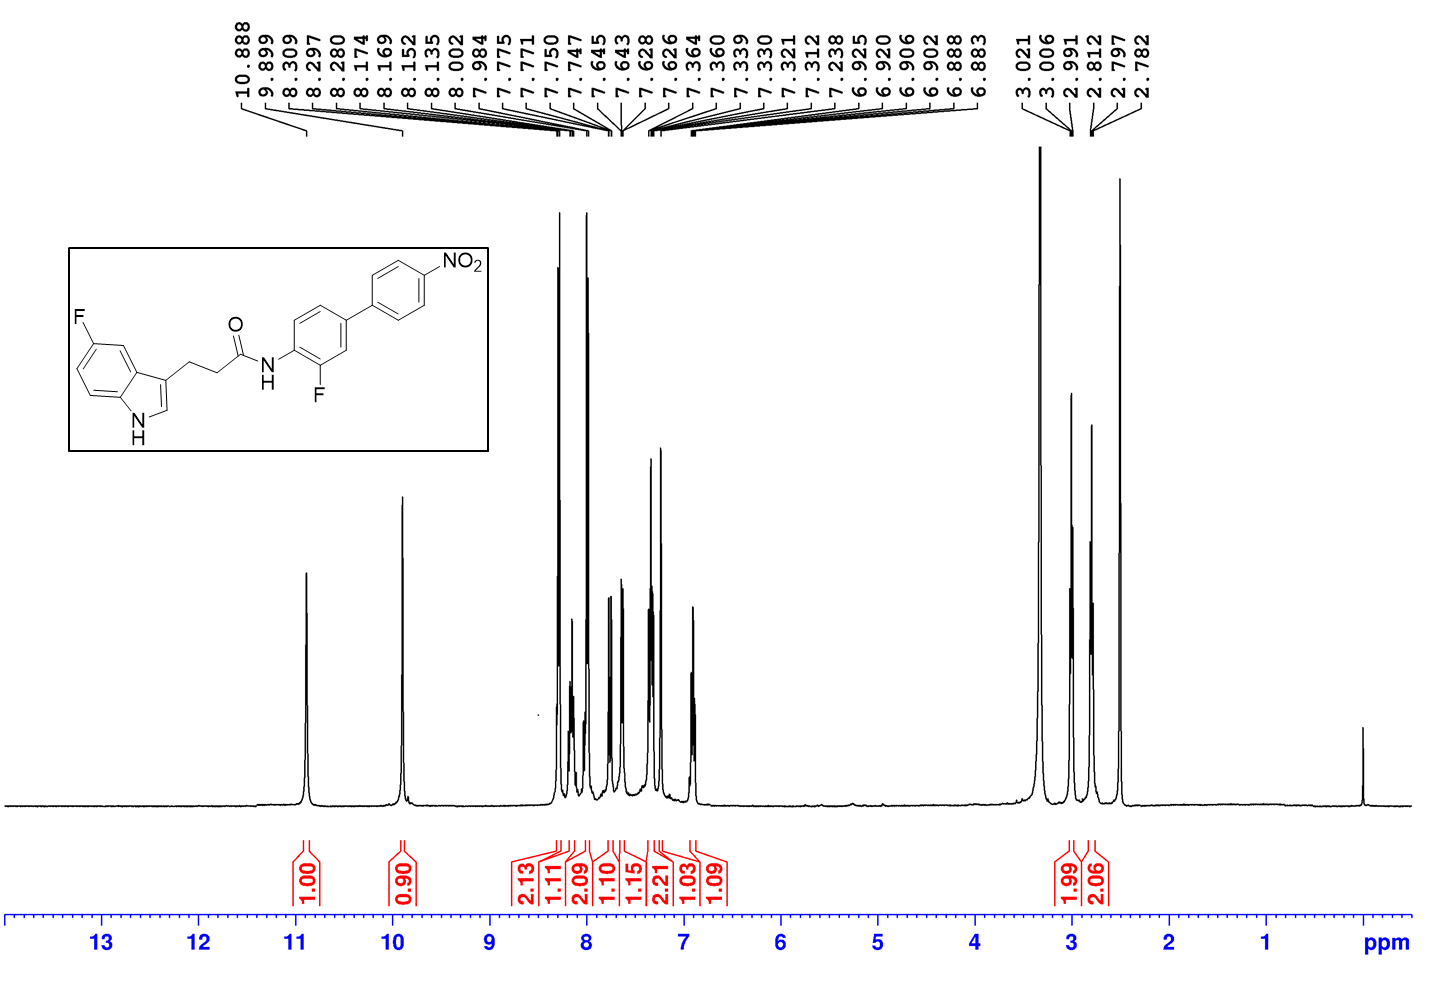
**

**Figure S10**. 1HNMR spectrum of **D4.**


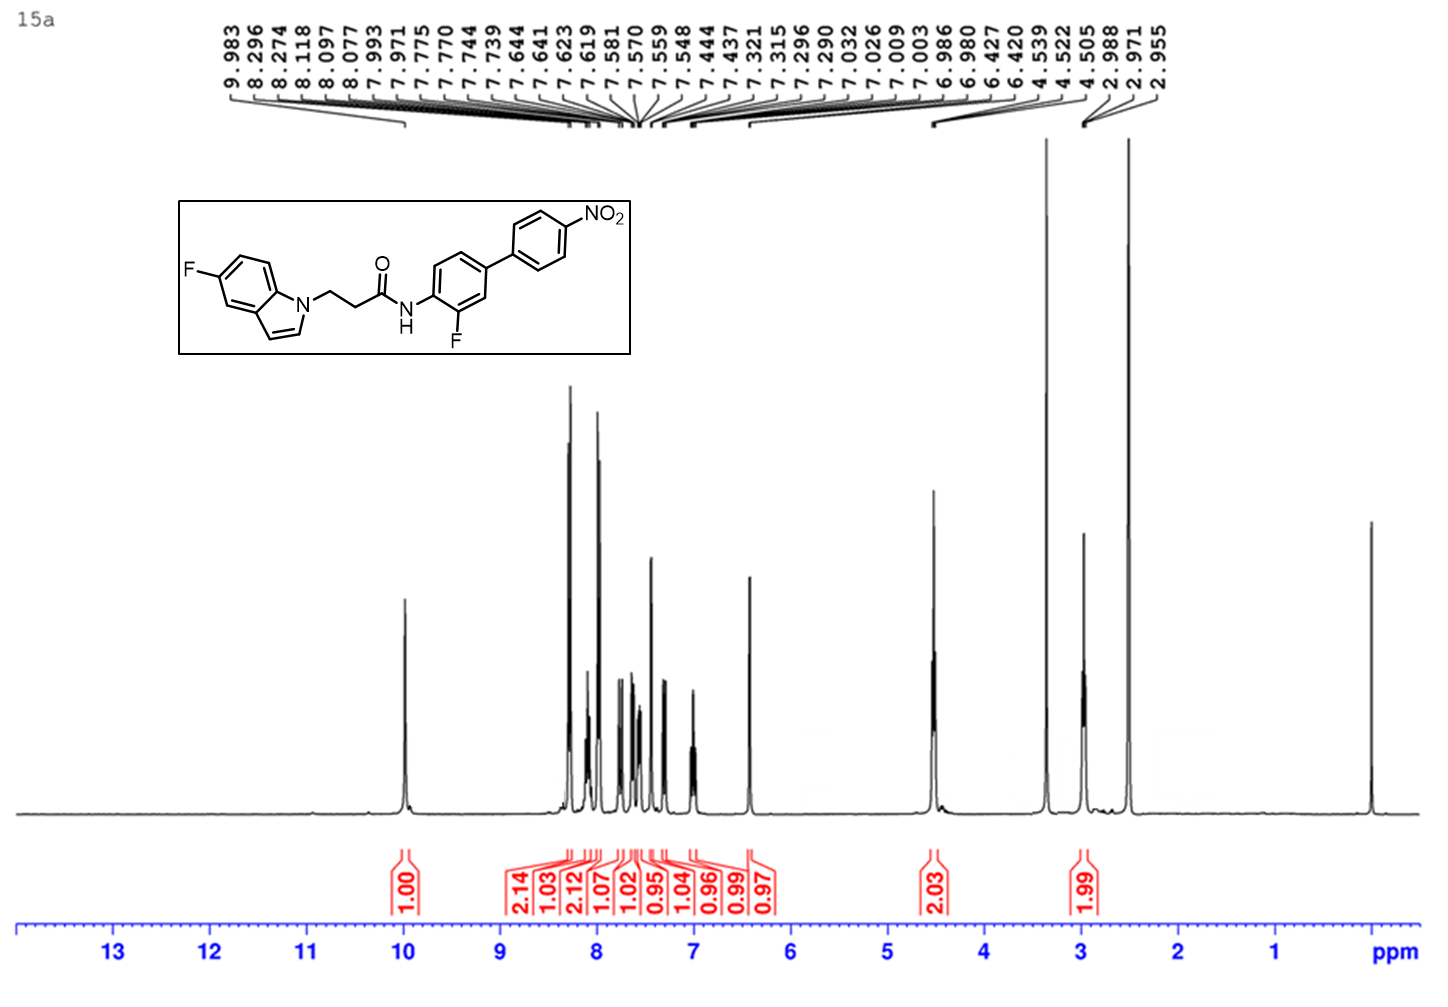


**Figure S11**. 1HNMR spectrum of **D5.**


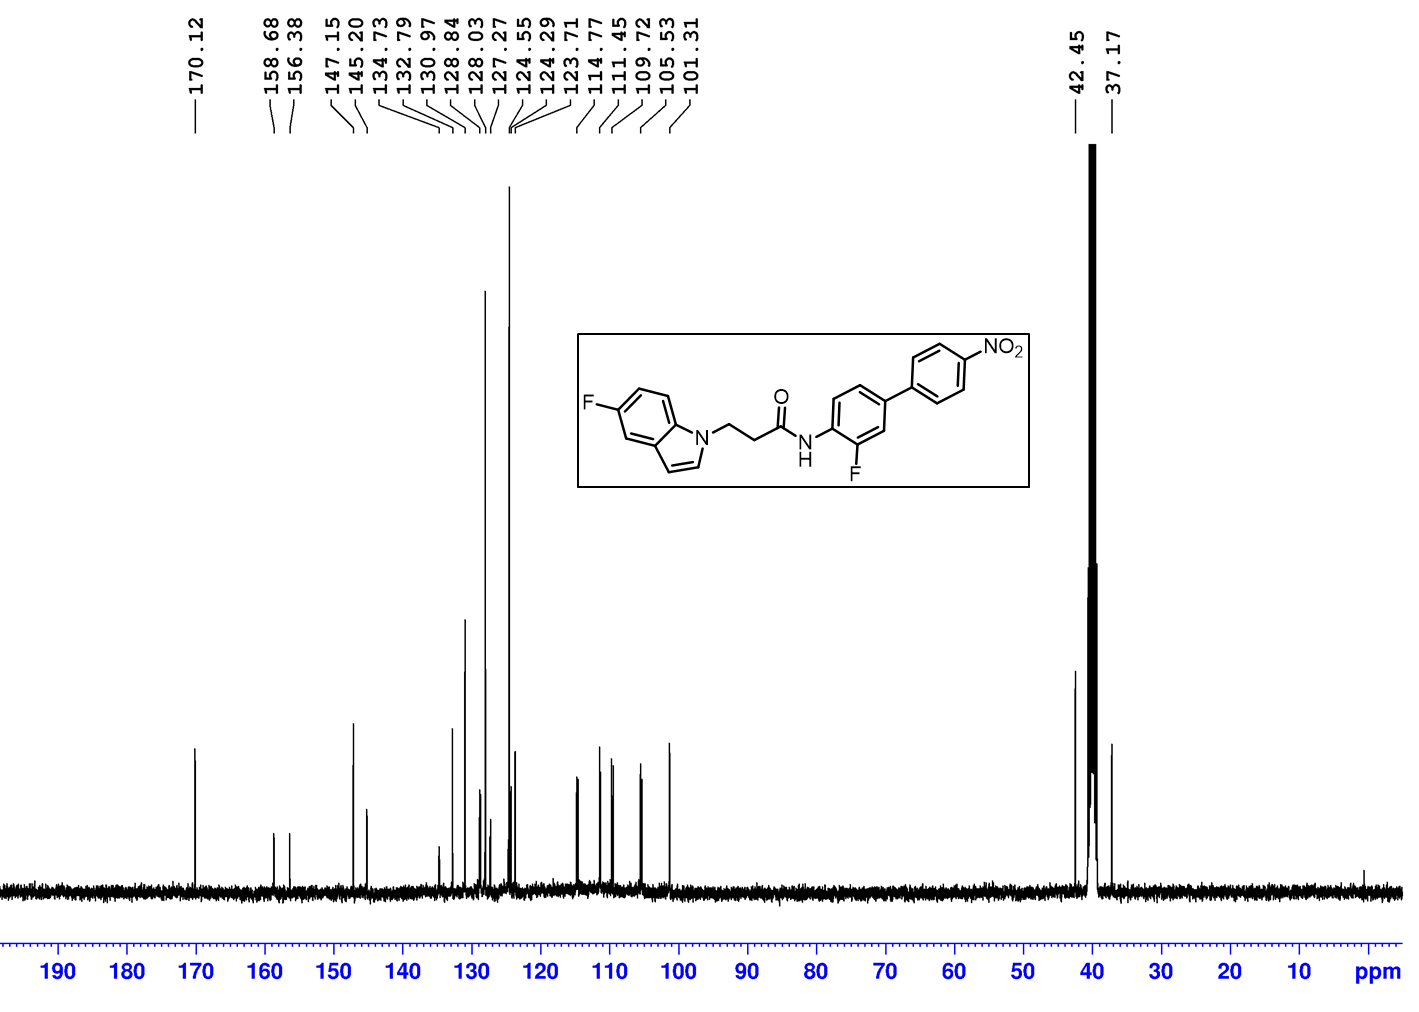


**Figure S12**. 13CNMR spectrum of **D5.**


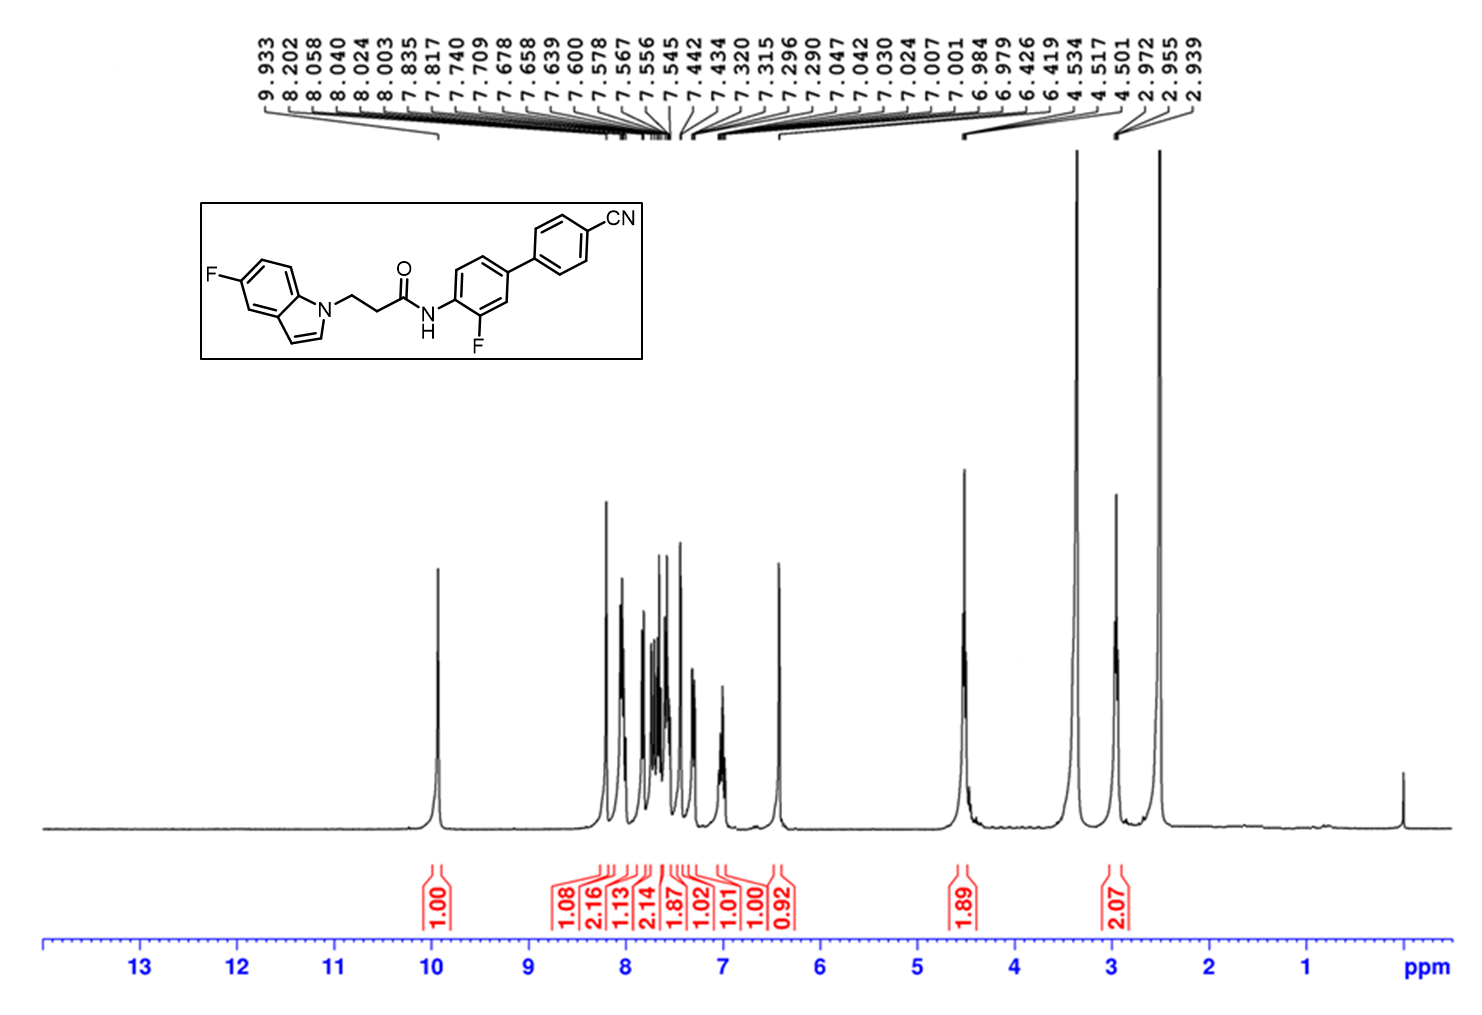


**Figure S13**. 1HNMR spectrum of **D6.**

**
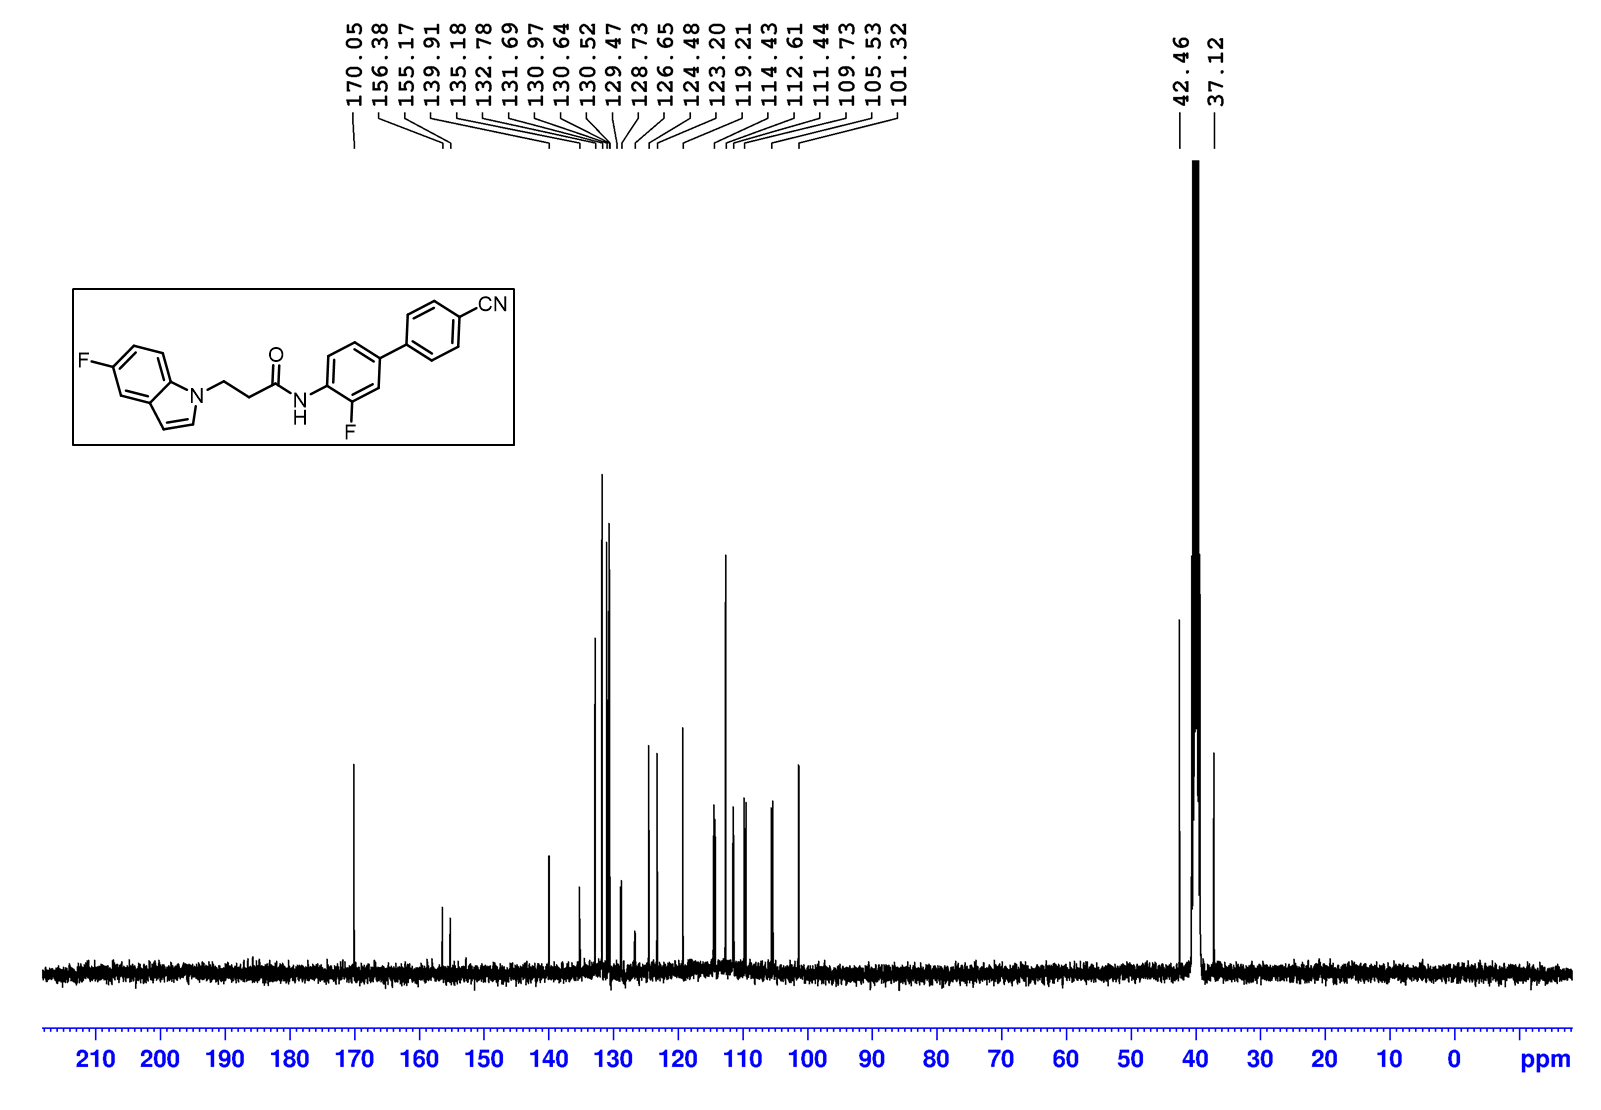
**

**Figure S14**. 13CNMR spectrum of **D6.**


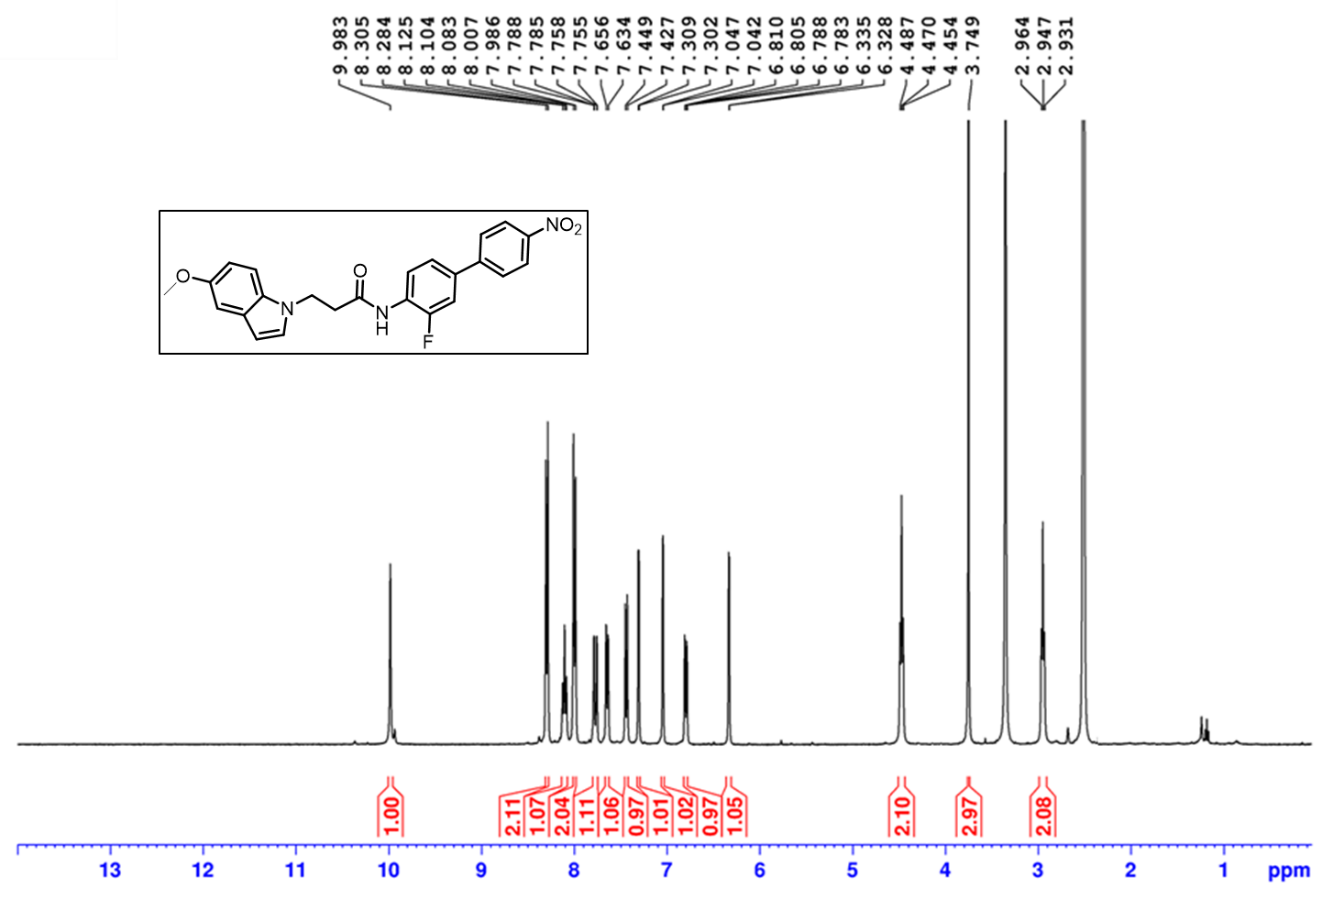


**Figure S15**. 1HNMR spectrum of **D7.**

**
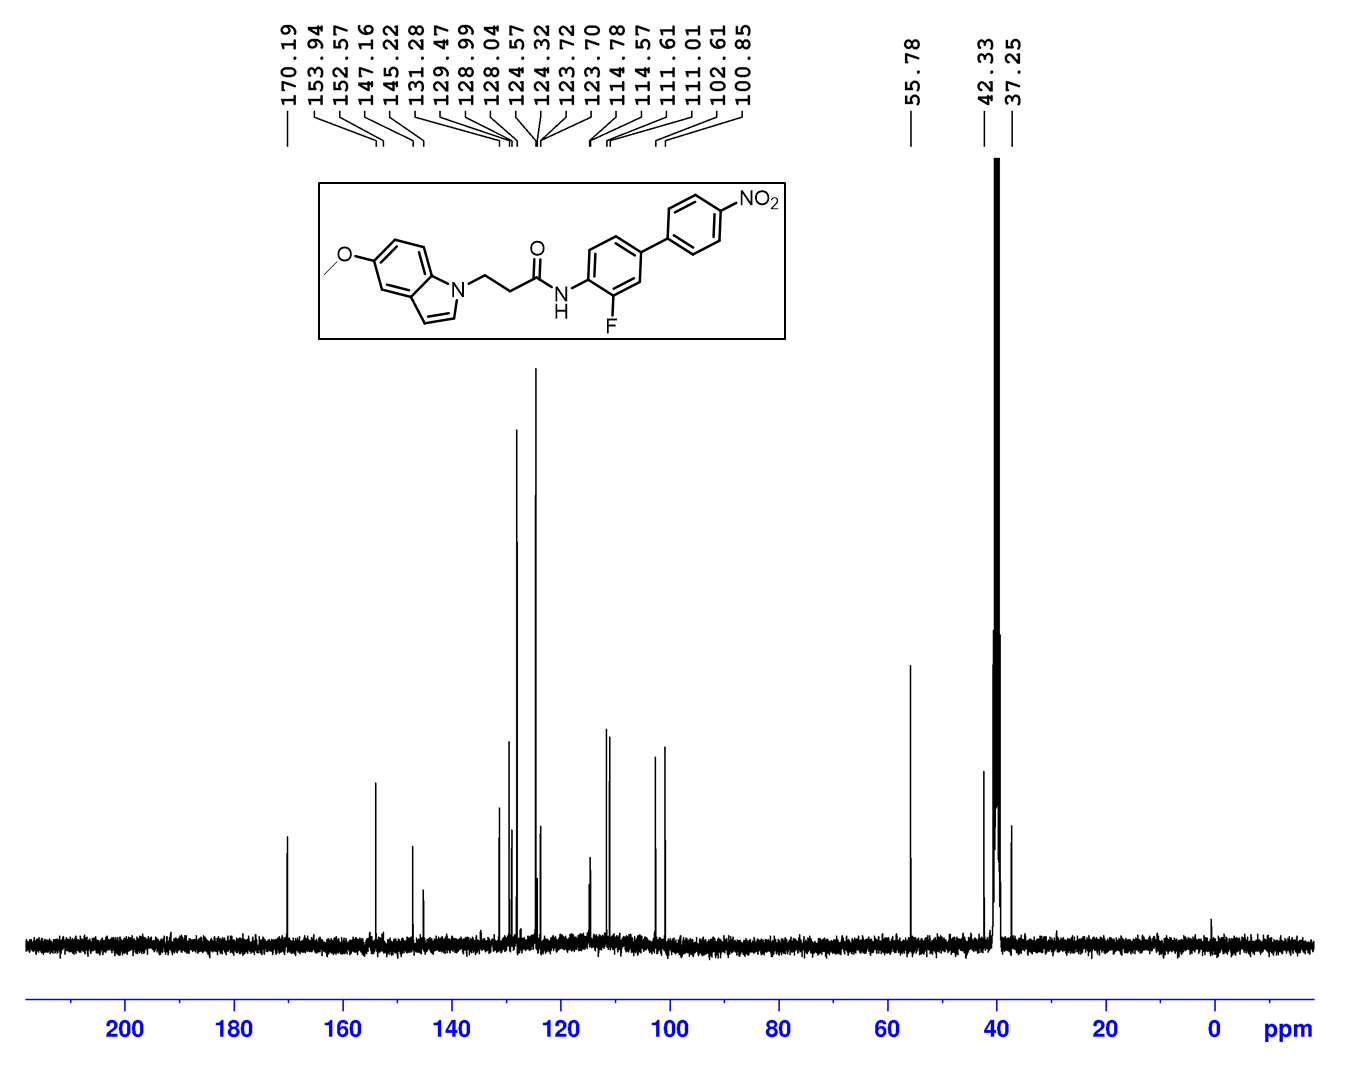
**

**Figure S16**. 13CNMR spectrum of **D7.**
